# Supplementary material for: Self‐Aggregating Tau Fragments Recapitulate Pathologic Phenotypes and Neurotoxicity of Alzheimer's Disease in Mice
Source: PubMed Central journal article supplement (PMC10582461; doi:10.1002/advs.202302035), 2023-08-18
Supplement: ADVS-10-2302035-s001.pdf [file ADVS-10-2302035-s001.pdf]

## Supporting Information

for *Adv. Sci.*, DOI 10.1002/adv.202302035

Self-Aggregating Tau Fragments Recapitulate Pathologic Phenotypes and Neurotoxicity of Alzheimer's Disease in Mice

*Ly Thi Huong Luu Le, Jeeyoung Lee, Dongjoon Im, Sunha Park, Kyoung-Doo Hwang, Jung Hoon Lee, Yanxialei Jiang, Yong-Seok Lee\*, Young Ho Suh\*, Hugh I. Kim\* and Min Jae Lee\**

**Self-aggregating Tau Fragments Recapitulate Pathologic Phenotype and  
Neurotoxicity of Alzheimer’s Disease in Mice**

Ly Thi Huong Luu Le, Jeeyoung Lee, Dongjoon Im, Sunha Park, Kyoung-Doo Hwang, Jung Hoon Lee, Yanxialei Jiang, Yong-Seok Lee, Young Ho Suh, Hugh I. Kim, and Min Jae Lee

**Table of Contents**

Supporting figures and figure legends

**Figure S1.** Seeding effect of tau-AC on tau-FL aggregation *in vitro*..... S2  
**Figure S2.** Biochemical analysis of tau-AC and its phosphor-mimetics..... S4  
**Figure S3.** Biophysical analysis of tau-AC and its phosphor-mimetics..... S5  
**Figure S4.** Reduced aggregation-propensity of tau-AC lacking the N-terminal PHF6 motif and phosphor-mimetic tau-AC..... S7  
**Figure S5.** Internalization of tau-AC aggregates into cells..... S8  
**Figure S6.** The effect of stereotaxically injected tau-AC-wt or -S356D on the behavioral and biochemical phenotypes of mice..... S10

## Supporting figures and figure legends

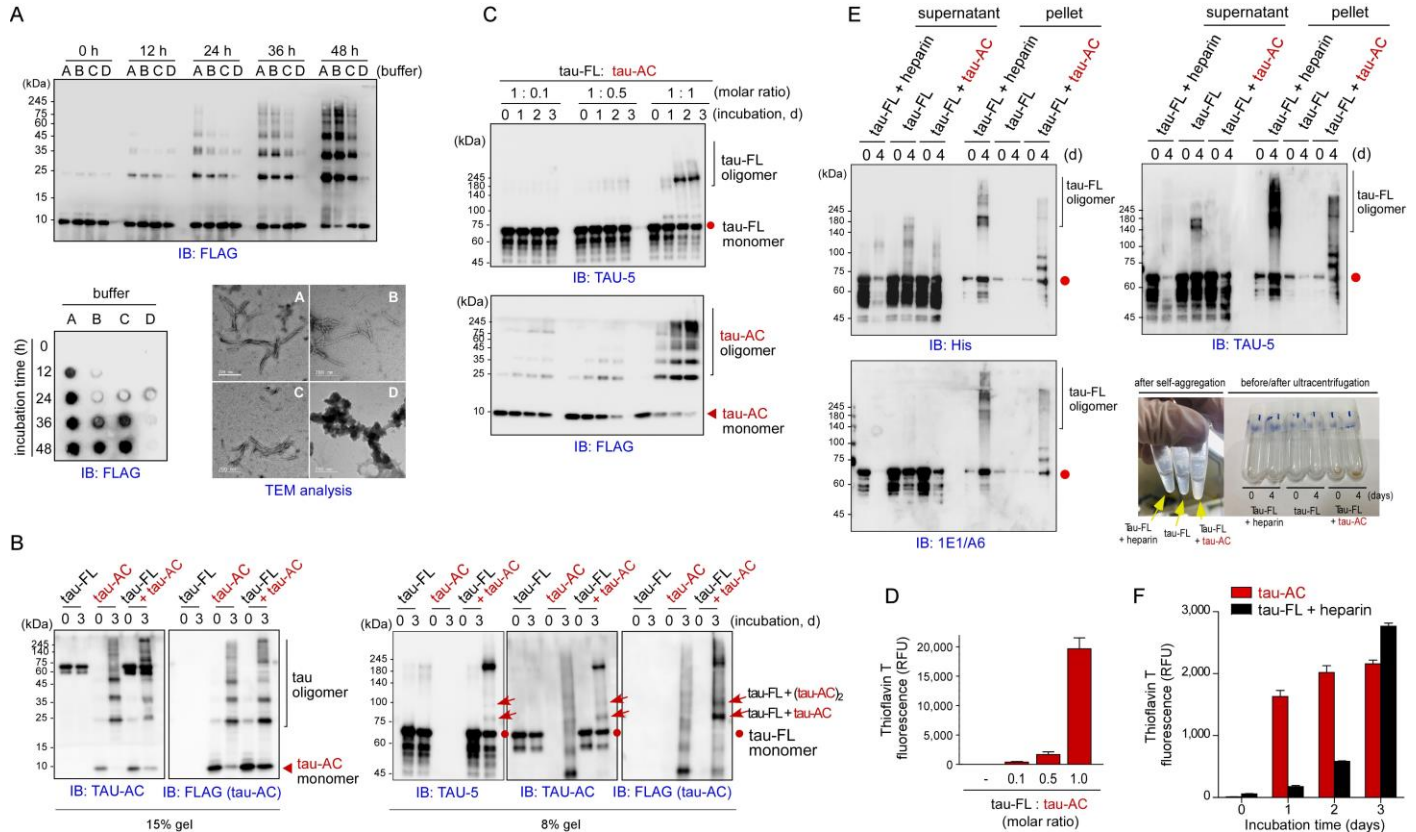

**Figure S1. Seeding effect of tau-AC on tau-FL aggregation *in vitro*.** (A) Tau-AC self-aggregation experiments were performed as described in Fig. 1A using four different buffer (Buffer A, 10 mM HEPES, 100 mM NaCl, 1 mM DTT, pH 7.4; Buffer B, 10 mM phosphate buffer, 10 mM DTT, pH 7.4; Buffer C, 10 mM phosphate buffer, 100 mM NaCl, 10 mM DTT, pH 7.4; Buffer D, 10 mM phosphate buffer, 200 mM MgCl<sub>2</sub>, 10 mM DTT, pH 7.4). The samples were analyzed with the following analyses. (*top*) Non-reducing SDS-PAGE followed with anti-FLAG immunoblotting (IB). (*bottom, left*) Filter-trap analysis/IB using anti-FLAG antibodies. (*bottom, right*) Transmission electron microscopy (TEM) analysis using tau-AC samples incubated for 48 h. (B) Tau-FL (20 μM) and tau-AC<sup>FLAG</sup> (20 μM) were incubated at 37°C with mild agitation. After 3 days, samples were subjected to non-reducing SDS-PAGE and immunoblotting (IB) using

anti-FLAG, TAU-5, and TAU-AC antibodies. Representative blot from three experiments is shown. (C) Samples were incubated as described in (A) using different reactant ratios and incubation times as indicated. (D) Tau-FL was incubated with tau-AC (molar ratios 0.1, 0.5, or 1.0) for 2 days, and thioflavin T (ThT) fluorescence intensity was measured at 485 nm. (E) Tau-FL (20  $\mu$ M) proteins were incubated with either heparin (80  $\mu$ M) or tau-AC (20  $\mu$ M) for 4 days and then subjected to ultracentrifugation at 120,000 $\times$   $g$  for 1 h. The supernatant and pellet fractions were collected and analyzed by SDS-PAGE/IB with antibodies as indicated. (F) ThT assays were performed using tau-AC (20  $\mu$ M) only and Tau-FL (20  $\mu$ M) combined with heparin (80  $\mu$ M) for the indicated time periods. All immunoblots shown are representative from two or three independent experiments. These data supplement Figure 1.

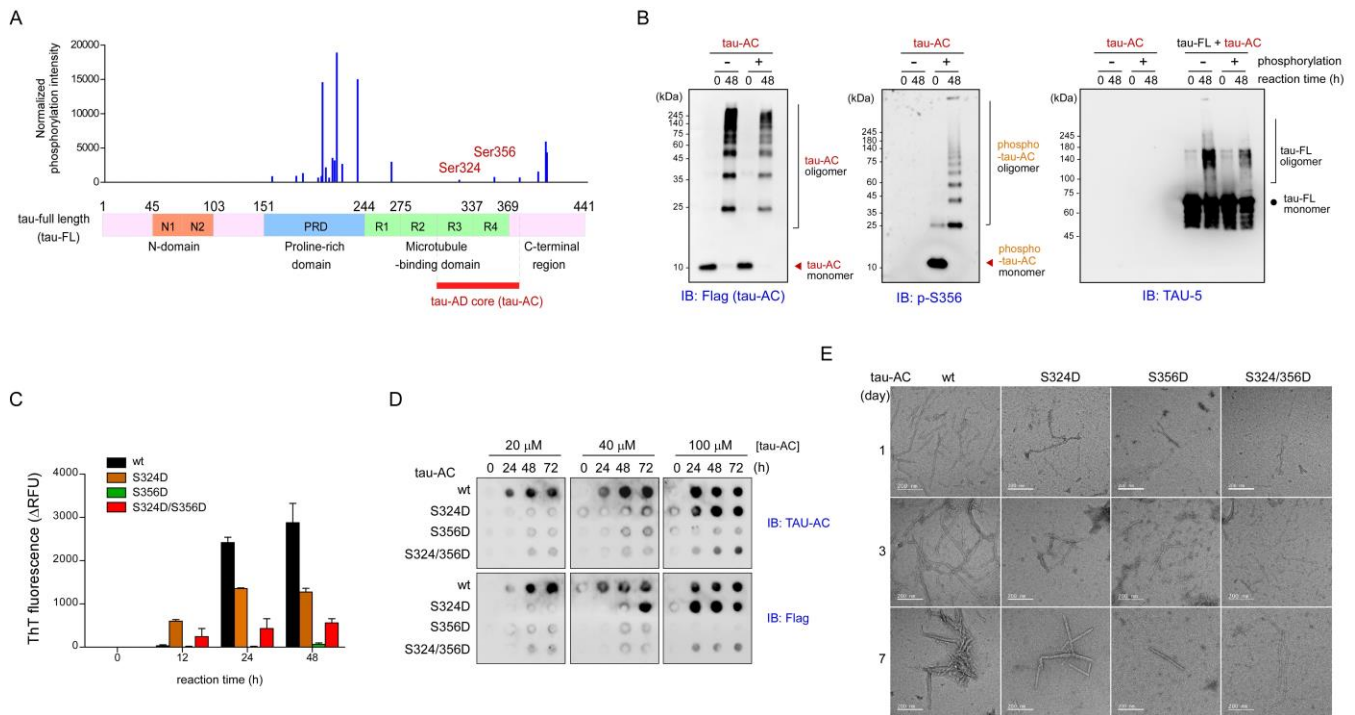

**Figure S2. Biochemical analysis of tau-AC and its phospho-mimetics.** (A) Recombinant His-tau (0.5  $\mu$ g) was phosphorylated *in vitro* by GSK3 $\beta$  (1  $\mu$ g with 1 mM ATP) for 4 h and then subjected to MS analysis. Even though there are numerous phosphorylation sites in the proline-rich domain, only Ser324 and Ser356 in the tau-AC region are identified to be phosphorylated. (B) *In vitro* phosphorylation reactions were performed by incubating tau-AC and GSK3 $\beta$  at 30°C for 16 h. Next, phosphorylated tau-AC (20  $\mu$ M) was incubated with tau-FL (20  $\mu$ M) for 2 days at 37°C with mild agitation and samples were analyzed by IB using antibodies as indicated. Representative blot from two experiments is shown. (C) The ThT assay was performed using 4  $\mu$ M of tau-AC-wt and its phospho-mimetic mutants (S324D, S356D, and S324D/S356D); samples were incubated for the indicated time periods. (D) Filter-trap assays using recombinant tau-AC species were performed with concentrations and incubation times as indicated. Trapped tau fibrils were detected by IB using indicated antibodies. (E) Representative TEM images of negatively stained tau filaments (tau-AC-wt, -S324D, -S356D, and -S324D/S356D). Recombinant tau-AC and its mutants (20  $\mu$ M) were incubated for 1, 3, or 7 days at 37°C. Scale bars = 200 nm.

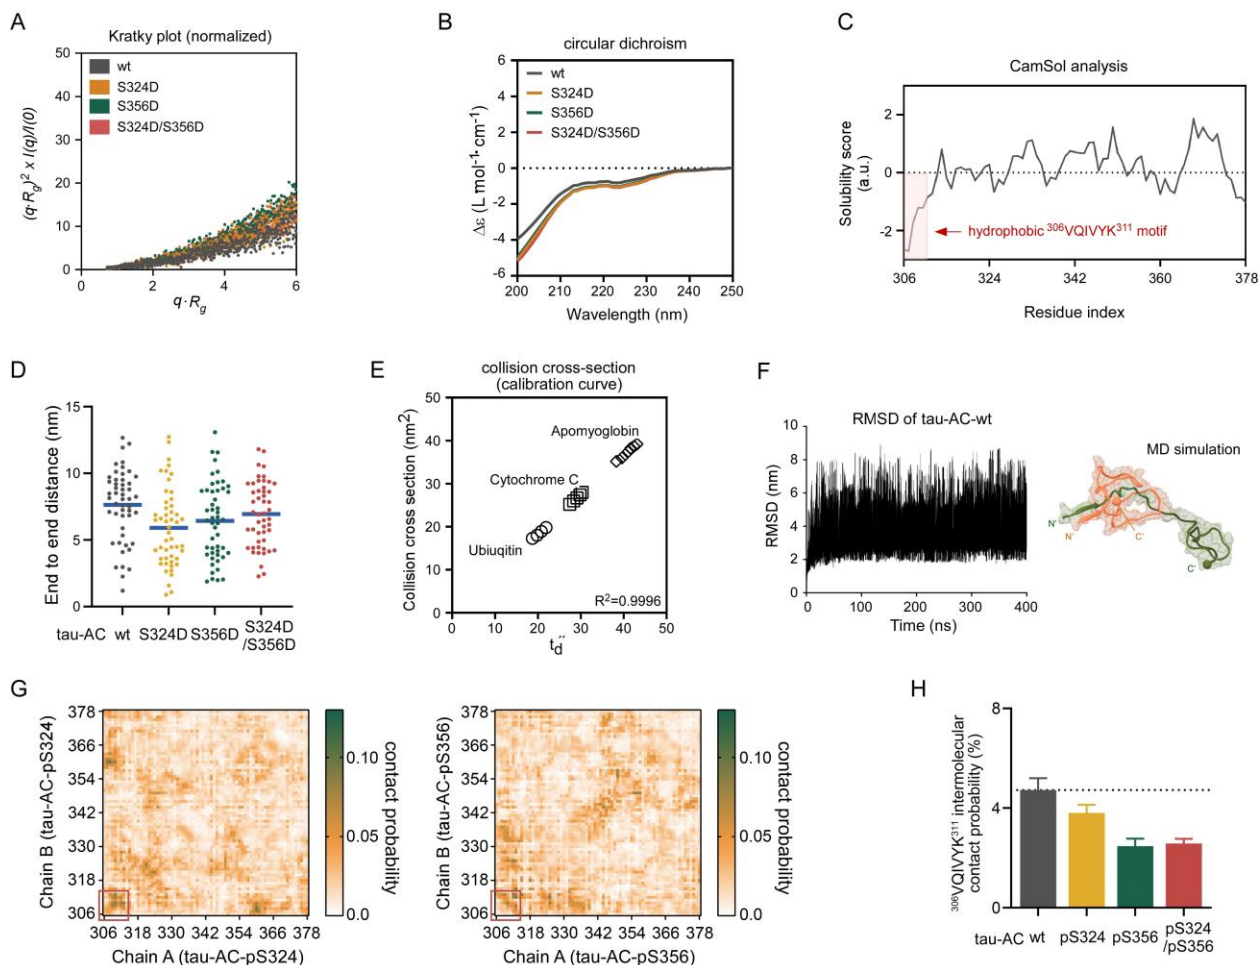

**Figure S3. Biophysical analysis of tau-AC and its phospho-mimetics.** (A) Kratky analysis of tau-AC wild-type (wt), its single phospho-mimetic mutants (S324D and S356D), and double phospho-mimetic mutants (S324D/S356D) was performed using small-angle X-ray scattering profiles. (B) Circular dichroism spectra of tau-AC-wt and phospho-mimetic mutants. (C) CamSol solubility profile of tau-AC at neutral pH (pH = 7). The PHF6 residues (amino acids 306 – 311) located at the N-terminus show poor solubility. (D) Structural conversion of tau-AC-wt and its mutants observed in 50 ensemble structures obtained from EOM analysis. End-to-end distance calculations ( $7.63 \pm 0.37$  nm for the wild-type and  $5.91 \pm 0.41$ ,  $6.43 \pm 0.40$ , and  $6.95 \pm 0.34$  nm

for the S324D and S356D and S324D/S356D variants, respectively). **(E)** The collision cross-section calibration curves using standard proteins with known CCS values, such as ubiquitin, cytochrome C, and apomyoglobin ( $R^2 > 0.999$ ). **(F)** Root-mean-square deviation (RMSD) data from the MD simulation (*top*) and the representative structures (*bottom*) of tau-AC-wt homodimers. The RMSD from the initial structure was merged after 70 ns. Two chains in the structure are depicted in different colors (orange and green) and the C-terminal end of each chain is resented as a sphere. **(G)** Interchain contact probability maps of single phosphorylated tau-AC at S324 and S356 (tau-AC-pS324 and -pS356, respectively). Identical calculations were performed as in Fig. 2H. Red boxes indicate the  $^{306}\text{VQIVYK}^{311}$  hexapeptides located at the N-termini of tau-AC. **(H)** Averaged intermolecular contact probability between the  $^{306}\text{VQIVYK}^{311}$  hexapeptides of tau-AC-wt and its phosphorylated forms ( $4.72 \pm 0.47\%$  in the wild-type and  $3.80 \pm 0.33\%$ ,  $2.47 \pm 0.30\%$ , and  $2.58 \pm 0.18\%$  in the pS324, pS356, and pS324/pS356, respectively). The error bars represent the standard error of mean. These data supplement Figure 2.

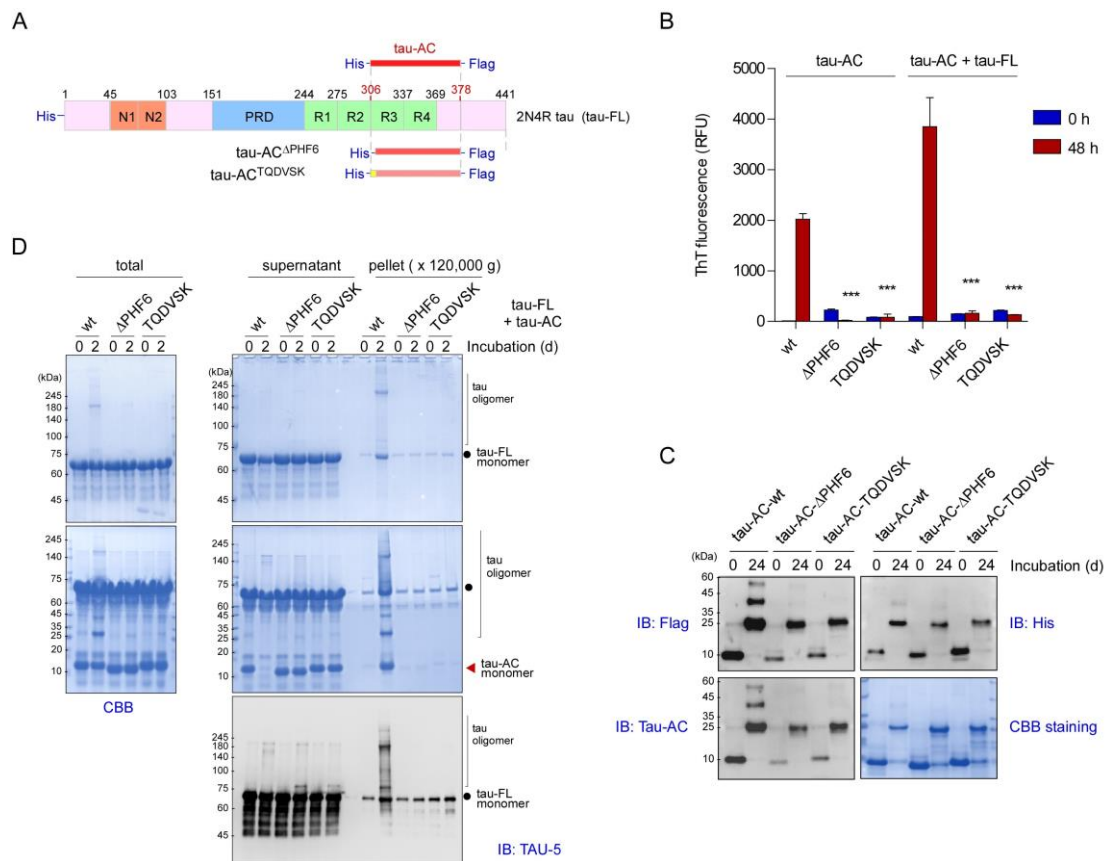

**Figure S4. Reduced aggregation-propensity of tau-AC lacking the N-terminal PHF6 motif and phospho-mimetic tau-AC.** (A) Schematic diagram of tau-AC mutants where the PHF6 motif was deleted (tau-AC- $\Delta$ PHF6) or substituted with hydrophilic residues (tau-AC-TQDVSK). (B) Markedly reduced ThT signal intensities of the PHF6 mutants compared to that of tau-AC-wt. Both tau-AC only and tau-AC/tau-FL co-incubation conditions were evaluated using the mutant species as described in Fig. 1E. Error bars represent standard errors of the mean. RFU, relative fluorescence unit. \*\*\* $p < 0.001$  ( $n = 3$ , one-way ANOVA). (C) Loss of self-aggregation propensity of tau-AC mutants lacking the hydrophobic PHF6 motif. Tau-AC-wt (20  $\mu$ M each) were incubated with either tau-AC- $\Delta$ PHF6 or -TQDVSK for self-oligomerization for 24 h. The samples were subjected to non-reducing SDS-PAGE/IB with indicated antibodies and Coomassie Brilliant Blue (CBB) staining. Representative blots from two independent experiments. (D) As in (C), except that tau-AC species were co-incubated with tau-FL (20  $\mu$ M), and the samples were separated into supernatant and pellet fractions with ultracentrifugation (at 68,000 $\times$  g for 20 min) before SDS-PAGE/IB analyses.



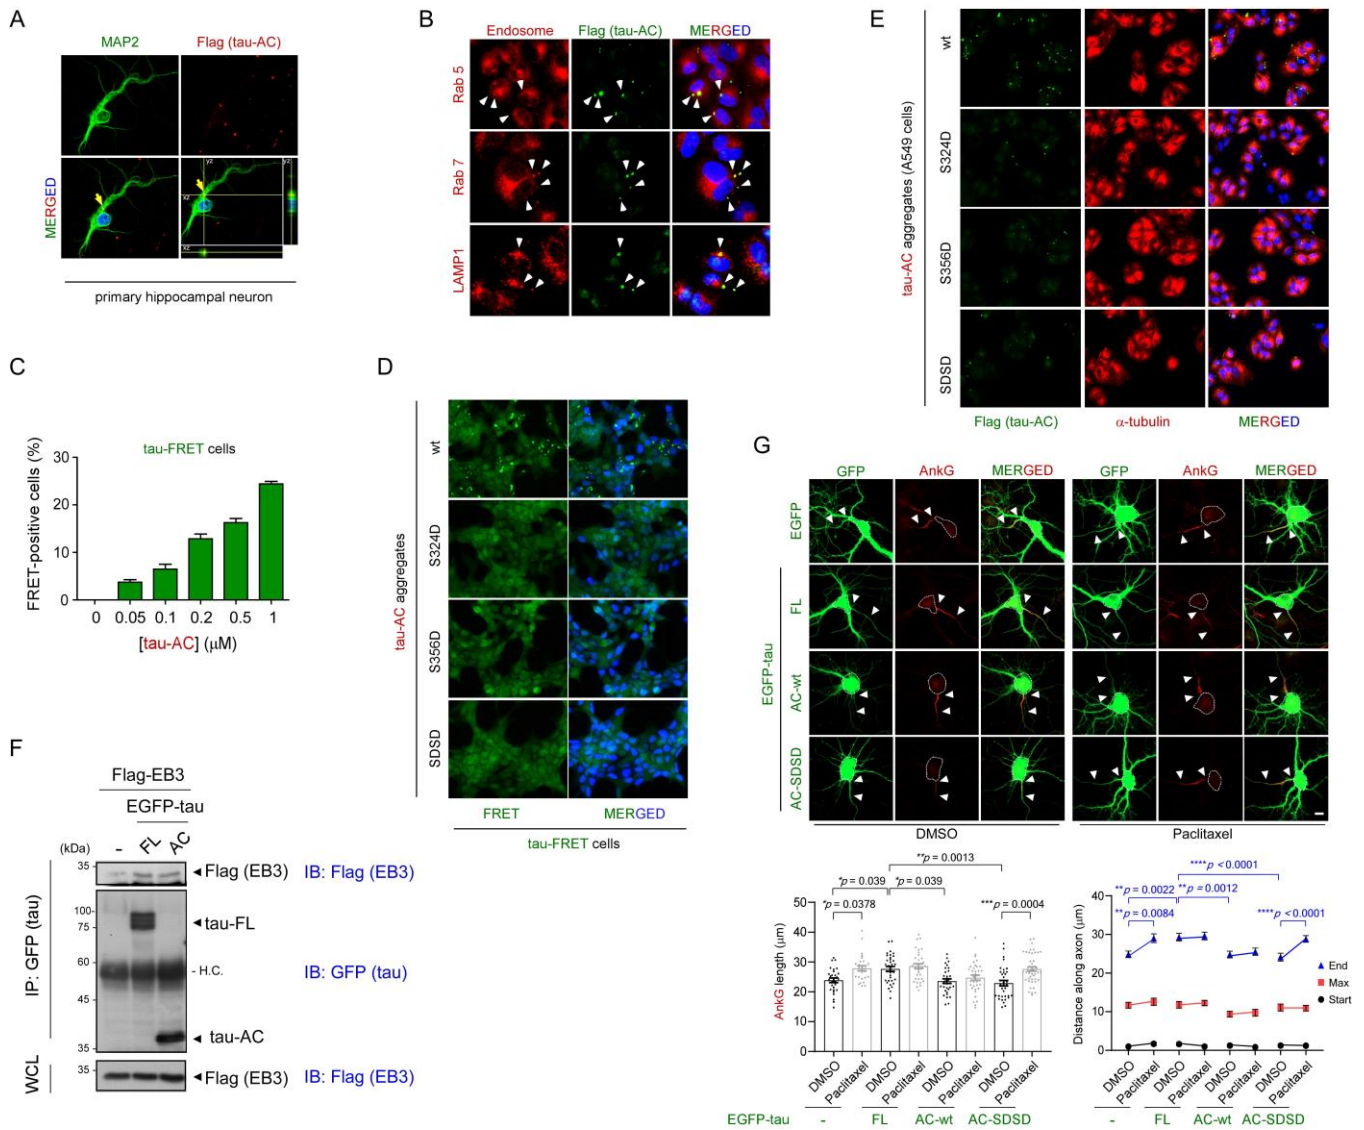

**Figure S5. Cellular uptake of tau-AC aggregates.** (A) Day 10 *in vitro* (DIV 10) primary rat hippocampal neurons were incubated with oligomerized tau-AC (0.1  $\mu\text{M}$ ) for 3 days, vigorously washed three times, and then co-immunostained using anti-MAP2 (for differentiated neuron) and anti-FLAG (for tau-AC) antibodies. Nuclei were counterstained with DAPI. Yellow arrows indicate intraneuronal tau-AC. (B) A549 cells were treated with 1  $\mu\text{M}$  of tau-AC aggregates for 24 h, trypsinized, replated, and then immunostained with anti-FLAG (tau-AC), anti-Rab5 (early

endosomes), anti-Rab7 (late endosomes), or anti-LAMP1 (lysosomes) antibodies. Arrowheads point to tau-AC colocalized with the components of the endosomal-lysosomal pathway. **(C)** HEK293 tau-P301S biosensor cells were treated with oligomeric forms of tau-AC-wt. After 24 h, cells were fixed and FRET signals were measured. FRET-positive signals were not observed in cells treated with tau-AC monomers. **(D)** Experiments were performed as described in **(C)** using tau-AC-wt and its phospho-mimetic mutants (tau-AC-S324D, -S356D, and -SDSD) to obtain the FRET images. Before added to the cells, tau species were subjected to *in vitro* oligomerization reactions for 48 h and the same amount (1  $\mu$ M total) of tau were incubated to the cells for another 24 h. **(E)** Representative images of A549 cells incubated with tau-AC-wt and its phospho-mimetic mutants for 24 h. Internalized tau-AC species were detected by immunofluorescence using an anti-FLAG antibody. These data supplement Figure 3. **(F)** Direct interaction between End-binding protein 3 (EB3) and tau-AC. FLAG-tagged EB3 and EGFP-tagged tau-FL or tau-AC were transiently overexpressed in HEK 293T cells for 2 days. Whole-cell lysates were subjected to immunoprecipitation using anti-GFP antibodies, followed by IB as indicated. H.C., heavy chain. **(G)** Tau-AC-SDSD mutant restores AIS structural plasticity. DIV 14 primary hippocampal neurons expressing EGFP (vec), EGFP-tagged tau-FL, tau-AC-wt, or tau-AC-S324D/S356D (SDSD) were treated with 1 nM paclitaxel, a microtubule-stabilizing agent, for 3 h. AIS localization and lengths were analyzed as described in Fig. 4A. White arrowheads represent the start and end points of the AIS. Scale bar, 10  $\mu$ m. Distances along the axon and AIS lengths were analyzed using two-way ANOVA and one-way ANOVA, respectively, followed by Tukey multiple comparison test (N = 3).

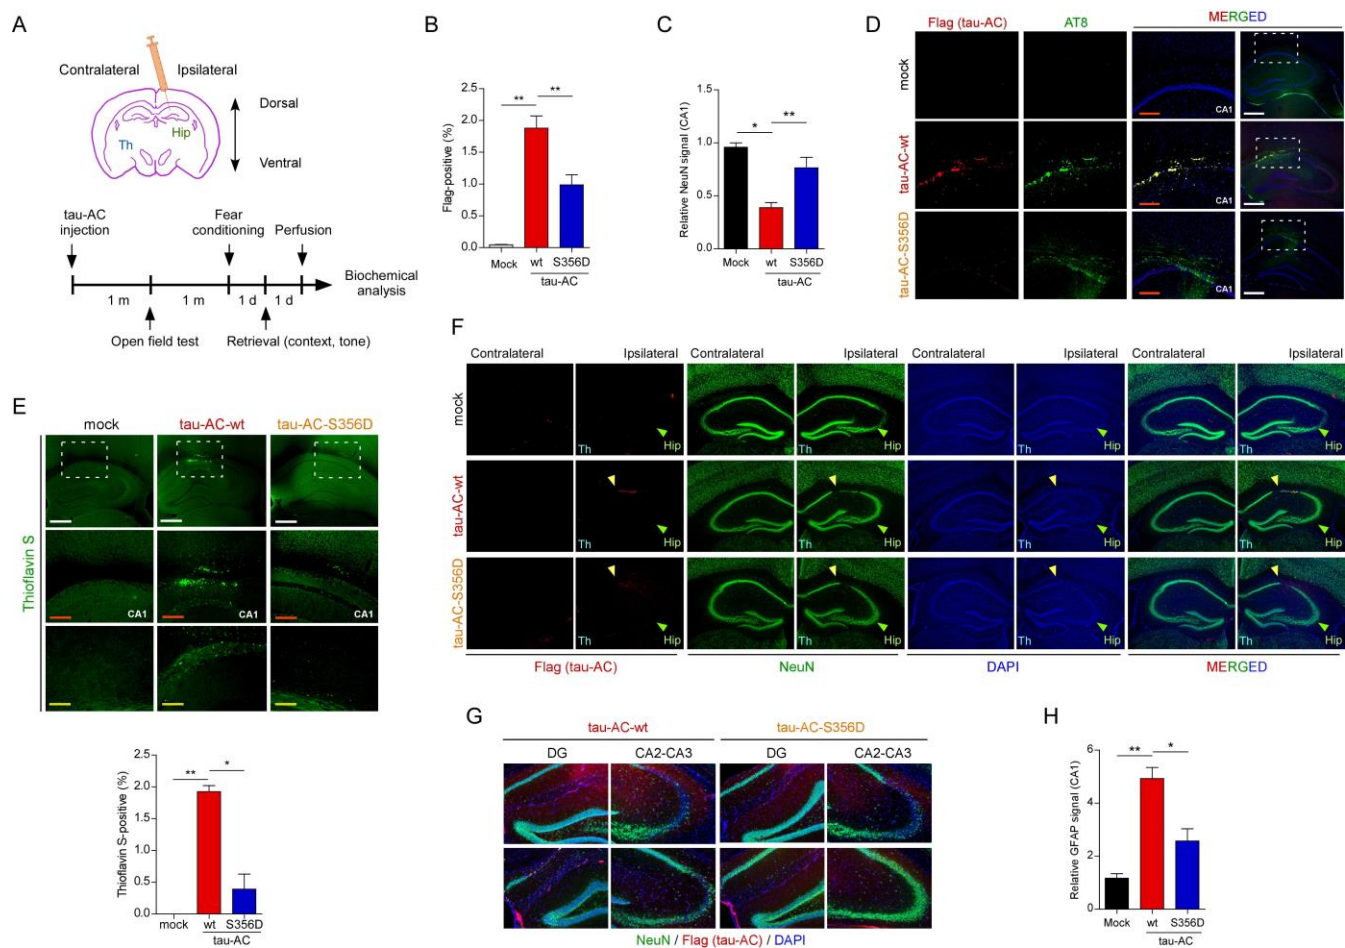

**Figure S6. The effect of stereotactically injected tau-AC-wt or -S356D on the behavioral and biochemical phenotypes of mice.** (A) Experimental design of the study. A unilateral injection of either tau-AC-wt or -S356D mutant (a total 5  $\mu$ g proteins after *in vitro* oligomerization reactions for 48 h) was administered into the hippocampus of 9-week old wild-type mice. Hip, hippocampus; Th, thalamus. (B) Quantitation of Figure 5B. The intensity of FLAG-positive signals (tau-AC) was measured and plotted as the mean  $\pm$  SD (mock, n = 9; tau-AC-wt, n = 9; tau-AC-S356D, n = 10). \* $p$  < 0.05, \*\* $p$  < 0.01, \*\*\* $p$  < 0.001 (one-way ANOVA followed by the Bonferroni post-hoc test). (C) Quantification of NeuN intensity in the CA1 region. Data were analyzed using one-way ANOVA with Bonferroni's multiple comparison test (n = 3/group). (D) Lower magnification

images of Fig. 5C. **(E)** (*upper*) Neurofibrillary tangles in the hippocampus and CA1 regions were detected using thioflavin S staining. White, red, and yellow scale bars = 400  $\mu\text{m}$ , 200  $\mu\text{m}$ , and 100  $\mu\text{m}$ , respectively. (*lower*) Thioflavin intensity was measured and plotted as the mean  $\pm$  SD (one-way ANOVA followed by the Bonferroni post-hoc test,  $N = 3$ ). **(F)** Experiments were performed as described in Fig. 5A; lower magnifications with the contralateral slides are shown. Hip, hippocampus (green arrowheads); Th, thalamus. Yellow arrowheads indicate CA1 regions with neurotoxicity, which correspond to tau-AC signal colocalization. **(G)** The dentrite gyrus (DG) and CA2-CA3 regions were stained for NeuN (neuron marker) and FLAG (injected tau-AC). **(H)** GFAP intensity in the CA1 region was quantified and analyzed using one-way ANOVA with Bonferroni's multiple comparison test ( $n=3/\text{group}$ ).
